# Supplementary material for: Towards Sustainable and Nutritionally Enhanced Flatbreads from Sprouted Sorghum, Tapioca, and Cowpea Climate-Resilient Crops
Source: Foods. 2023 Apr 13;12(8):1638. doi: 10.3390/foods12081638 (PMC10138180; doi:10.3390/foods12081638)
Supplement: Supplementary file 1 [file foods-12-01638-s001.zip › foods-2301745-supplementary.pdf]

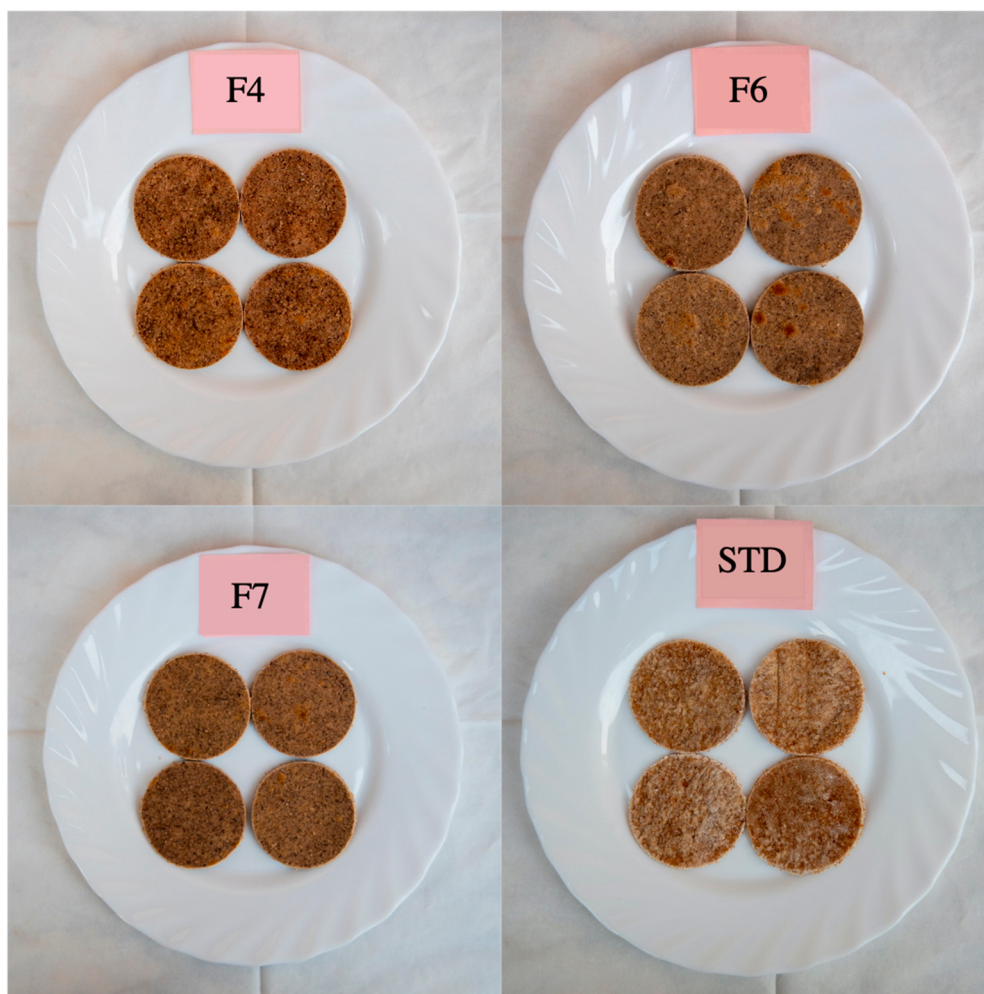

Figure S1. Selected composite flour flatbreads based on technological (F6), nutritional (F6 and F7) and economic sustainability criteria (F4). STD, standard 100% W bread.

Table S1:  $R^2$  and  $Q^2$  of the models generated by the controlled responses.

| Responses | $R^2$ | $Q^2$ |
|-----------|-------|-------|
| P_f       | 0.9   | 0.2   |
| P_e       | 0.7   | 0.5   |
| E_f       | 0.7   | 0.2   |
| E_e       | 0.6   | 0.5   |

P\_f, force at rupture from puncture test; P\_e, extensibility from puncture test; E\_f, force at rupture from one-dimensional extensibility test; E\_e, extensibility from one-dimensional extensibility test.

### 3.1.1. Significance of the models generated for the controlled responses

The model generated for the P\_f response was characterized by an  $R^2 = 0.9$  and a  $Q^2 = 0.2$ . A probable linear dependence of the response on the SS and C factors was observed: an increase in SS materialized in a probable negative effect on the response (decrease in P\_f), while an increase in C was more likely to affect positively (increase in P\_f). A negative effect from the interaction of the two factors (SS \* C) was also possible.

The model generated for the P\_e response was characterized by an  $R^2 = 0.7$  and a  $Q^2 = 0.5$ . A probable linear dependence on factors T and W was observed: an increase in T materializes in a probable positive effect on the response (increase in P\_e), while an increase in W more likely affected negatively (decrease in P\_e). The interaction coefficients revealed a positive quadratic dependence of the response on the factors W and T (W \* W and T \* T) indicating the need for a second order equation to describe the model. There was also an interaction effect of the two factors (W \* T), which was manifested by a distortion effect of the response surface.

The model generated for the E\_f response was characterized by an  $R^2 = 0.7$  and a  $Q^2 = 0.2$ . A probable linear dependence on the factors SS, T and water was found: an increase in SS or T materialized in a probable negative effect on the response (decrease in E\_f), while the increase in water was more likely to affect positively (increase of E\_f). As described before, also in this case the interaction coefficients revealed a positive quadratic dependence of the response on the factors SS and T (SS \* SS and T \* T).

Finally, the model generated for the E\_e response was characterized by an  $R^2 = 0.6$  and a  $Q^2 = 0.5$ .

Only the factor SS exerted an influence on the response, and a negative linear dependence was identified for it (as SS increased, E\_e decreased).

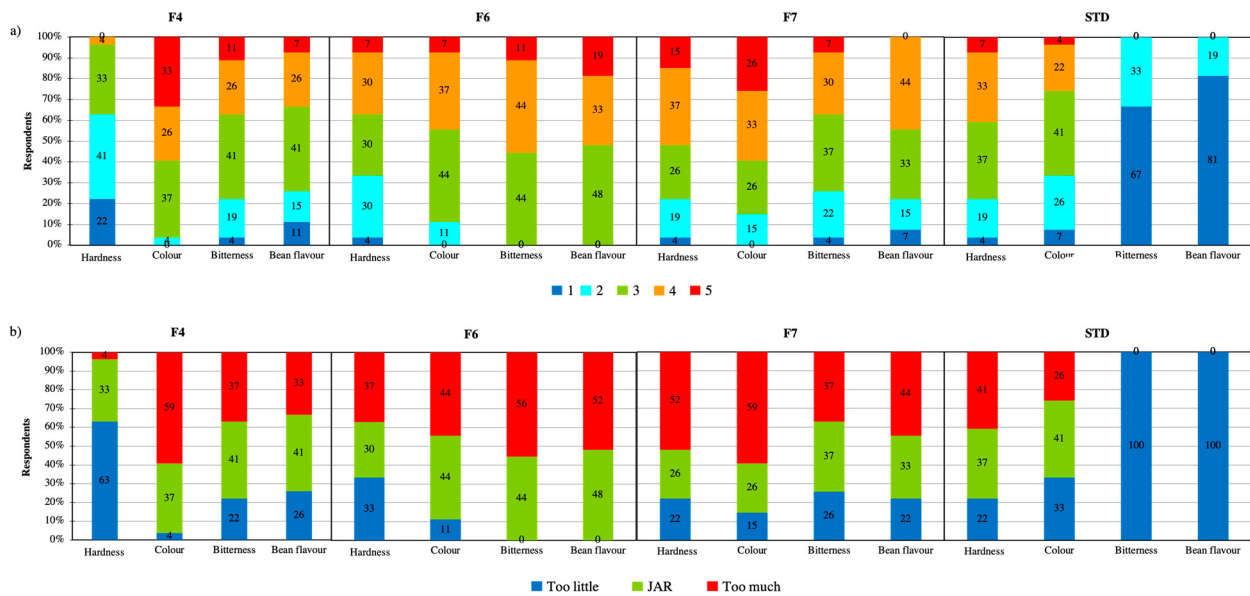

Figure S2. Percentage of respondents (n=27) giving consumer ratings for breads' hardness, darkness, bitterness and bean flavour a) based on 5-point JAR scale; b) collapsed on a 3-level scale.

Table S2. Penalty analysis table for F4 bread<sup>a</sup>.

| Variable     | Level      | Frequencies (%) | Sum (Overall liking) | Mean (Overall liking) | Mean drops | Penalties | p-value |
|--------------|------------|-----------------|----------------------|-----------------------|------------|-----------|---------|
| Hardness     | Not enough | 62.96           | 96.00                | 5.65                  | 0.13       | 0.11      | 0.790   |
|              | JAR        | 33.33           | 52.00                | 5.78                  |            |           |         |
|              | Too much   | 3.70            | 6.00                 | 6.00                  | -0.22      |           |         |
| Darkness     | Not enough | 3.70            | 6.00                 | 6.00                  | -0.40      | -0.17     | 0.686   |
|              | JAR        | 37.04           | 56.00                | 5.60                  |            |           |         |
|              | Too much   | 59.26           | 92.00                | 5.75                  | -0.15      |           |         |
| Bitterness   | Not enough | 22.22           | 33.00                | 5.50                  | 0.50       | 0.50      | 0.204   |
|              | JAR        | 40.74           | 66.00                | 6.00                  |            |           |         |
|              | Too much   | 37.04           | 55.00                | 5.50                  | 0.50       |           |         |
| Bean flavour | Not enough | 25.93           | 41.00                | 5.86                  | 0.05       | 0.34      | 0.383   |
|              | JAR        | 40.74           | 65.00                | 5.91                  |            |           |         |
|              | Too much   | 33.33           | 48.00                | 5.33                  | 0.58       |           |         |

Frequency of responses for the 3-level scale; sum of the liking scores for each level; average liking for each level. Mean drop for the "too much" and "too little" levels shows how many points of liking were lost for having a product that was "too much" or "too little" compared to the JAR level; penalty shows how many points of liking were lost for not being

as expected by the consumer. The  $p$ -value (significance level = 0.05) tested whether the penalty was significantly different from 0.

Table S3. Multiple pairwise comparisons (Nemenyi's procedure) performed on second preference ranking test data.

| Sample | Rank Sum of Sample* | Rank Mean of Sample |
|--------|---------------------|---------------------|
| F7     | 39c                 | 1.44                |
| F6     | 63bc                | 2.33                |
| F4     | 67b                 | 2.48                |
| STD    | 101a                | 3.74                |

\* Rank sum of the sample =  $\sum(\text{number of panelists} \times \text{respective rank position})$ . Lower rank sum indicated better-liked samples.
